# Supplementary material for: Association between Blood Pressure Variability and Clinical Outcomes after Successful Recanalization in Patients with Large Vessel Occlusion Stroke after Mechanical Thrombectomy
Source: Research Square preprint supplement (doi:10.21203/rs.3.rs-1727293/v1), 2022-06-13
Supplement: Supplementary file 1 [file 118acb15eb69d34f29f43d1b.docx]

Table S1 Univariate analysis for outcomes

|  | Statistics | 90-day mRS (3-6) | | 30-day mortality | | symptomatic intracerebral hemorrhage | |
| --- | --- | --- | --- | --- | --- | --- | --- |
|  |  | OR (95%CI) | P-value | OR (95%CI) | P-value | OR (95%CI) | P-value |
| MAP SD, mmHg | 9.1±2.9 | 1.17 (1.09, 1.26) | <0.001 | 1.35 (1.22, 1.48) | <0.001 | 1.23 (1.10, 1.37) | <0.001 |
| Age, year | 71.7±10.7 | 1.03 (1.01, 1.05) | <0.001 | 1.04 (1.01, 1.07) | 0.003 | 1.00 (0.96, 1.04) | 0.960 |
| Male, % |  |  |  |  |  |  |  |
| Females | 198 (43.2%) | Reference |  | Reference |  | Reference |  |
| Males | 260 (56.8%) | 0.74 (0.51, 1.07) | 0.107 | 0.60 (0.35, 1.04) | 0.068 | 0.49 (0.20, 1.23) | 0.129 |
| Hypertension, % |  |  |  |  |  |  |  |
| No | 118 (25.8%) | Reference |  | Reference |  | Reference |  |
| Yes | 340 (74.2%) | 1.98 (1.28, 3.07) | 0.002 | 2.54 (1.17, 5.51) | 0.019 | 2.02 (0.58, 7.01) | 0.269 |
| Diabetes mellitus, % |  |  |  |  |  |  |  |
| No | 329 (71.8%) | Reference |  | Reference |  | Reference |  |
| Yes | 129 (28.2%) | 1.23 (0.82, 1.84) | 0.327 | 1.80 (1.03, 3.16) | 0.039 | 1.10 (0.41, 2.92) | 0.852 |
| Atrial fibrillation, % |  |  |  |  |  |  |  |
| No | 244 (53.3%) | Reference |  | Reference |  | Reference |  |
| Yes | 214 (46.7%) | 1.79 (1.23, 2.59) | 0.002 | 1.30 (0.76, 2.24) | 0.336 | 0.93 (0.38, 2.29) | 0.874 |
| Level of occlusion, % |  |  |  |  |  |  |  |
| ICA | 185 (40.4%) | Reference |  | Reference |  | Reference |  |
| MCA 1 | 219 (47.8%) | 0.72 (0.48, 1.06) | 0.097 | 0.50 (0.29, 0.89) | 0.018 | 0.55 (0.22, 1.37) | 0.197 |
| MCA 2 | 54 (11.8%) | 0.68 (0.37, 1.26) | 0.219 | 0.25 (0.07, 0.85) | 0.027 | 0.00 (0.00, Inf) | 0.991 |
| ASPECTS, % |  |  |  |  |  |  |  |
| 6-8 | 261 (57.0%) | Reference |  | Reference |  | Reference |  |
| 9-10 | 197 (43.0%) | 0.54 (0.37, 0.78) | 0.001 | 0.42 (0.23, 0.78) | 0.005 | 0.70 (0.28, 1.80) | 0.461 |
| Baseline NIHSS | 16.0±4.1 | 1.24 (1.17, 1.31) | <0.001 | 1.22 (1.14, 1.31) | <0.001 | 1.07 (0.97, 1.18) | 0.195 |
| Bridging treatment, % |  |  |  |  |  |  |  |
| No | 261 (57.0%) | Reference |  | Reference |  | Reference |  |
| Yes | 197 (43.0%) | 0.78 (0.53, 1.13) | 0.182 | 0.91 (0.53, 1.57) | 0.731 | 0.70 (0.28, 1.80) | 0.461 |
| rescue treatment, % |  |  |  |  |  |  |  |
| No | 383 (83.6%) | Reference |  | Reference |  | Reference |  |
| Yes | 75 (16.4%) | 0.63 (0.38, 1.06) | 0.082 | 0.32 (0.11, 0.92) | 0.034 | 0.90 (0.26, 3.14) | 0.865 |
| Puncture to recanalization time, minute | 54.4±32.9 | 1.01 (1.00, 1.02) | 0.001 | 1.00 (1.00, 1.01) | 0.257 | 1.01 (1.00, 1.02) | 0.011 |
| Onset to recanalization time. minute | 270.1±83.5 | 1.00 (1.00, 1.00) | 0.029 | 1.00 (1.00, 1.01) | 0.069 | 1.01 (1.00, 1.01) | 0.014 |
| Continuous intravenous antihypertensive agents, % |  |  |  |  |  |  |  |
| No | 105 (22.9%) | Reference |  | Reference |  | Reference |  |
| Yes | 353 (77.1%) | 1.90 (1.20, 3.00) | 0.006 | 4.86 (1.72, 13.73) | 0.003 | 1.72 (0.49, 5.99) | 0.394 |
| MAP mean, mmHg | 90.7±8.9 | 1.02 (1.00, 1.04) | 0.116 | 1.00 (0.97, 1.03) | 0.885 | 0.97 (0.91, 1.02) | 0.215 |
